# Supplementary material
Source: PubMed Central journal article supplement (PMC8733015)
Supplement: 41392_2021_863_MOESM1_ESM.pdf [file 41392_2021_863_MOESM1_ESM.pdf]

# Supplementary Materials for

SARS-CoV-2 Omicron RBD shows weaker binding affinity than the  
currently dominant Delta variant to human ACE2

Leyun Wu<sup>1, #</sup>, Liping Zhou<sup>1, #</sup>, Mengxia Mo<sup>2, #</sup>, Tingting Liu<sup>3, #</sup>, Chengkun Wu<sup>2, #</sup>,  
Chunye Gong<sup>2</sup>, Kai Lu<sup>2</sup>, Likun Gong<sup>3, \*</sup>, Weiliang Zhu<sup>1, \*</sup>, and Zhijian Xu<sup>1, \*</sup>

<sup>1</sup>CAS Key Laboratory of Receptor Research; Drug Discovery and Design Center,  
Shanghai Institute of Materia Medica, Chinese Academy of Sciences, Shanghai 201203,  
China

<sup>2</sup>College of Computer Science and Technology, National University of Defense  
Technology, Changsha 410073, China

<sup>3</sup>Center for Drug Safety Evaluation and Research, Shanghai Institute of Materia Medica,  
Chinese Academy of Sciences, Shanghai 201203, China

<sup>#</sup>Leyun Wu, Liping Zhou, Mengxia Mo, Tingting Liu, and Chengkun Wu contributed  
equally to this work.

<sup>\*</sup>Correspondence to: lkong@cdser.simm.ac.cn (L.G.), wlzhu@simm.ac.cn (W.Z.),  
zjxu@simm.ac.cn (Z.X.).

## **This PDF file includes:**

Materials and Methods

Supplementary Text

Figures S1 to S8

Table S1 to S3

Captions for Movie S1

## 29 **Materials and Methods**

### 30 **Preparation of the three dimensional structures of mAb-S protein and ACE2-S** 31 **protein complexes**

32 The Omicron spike trimer was modelled by SWISS-MODEL Server in Alignment  
33 mode.<sup>1</sup> The Omicron homology model with the RBD up was chosen for further analysis.  
34 The Omicron spike were superimposed to a spike/ACE2 complex (PDB ID: 6VW1<sup>2</sup>)  
35 to create an Omicron-ACE2 complex structure. For the RBD-ACE2 system, zinc ion in  
36 the structure was retained. We retrieved 5 structures of marketed or clinical RBD-  
37 specific antibodies bound to S protein from the Protein Data Bank. The Omicron RBD  
38 domain containing residue 334-526 were truncated from the full-length S protein. In  
39 order to get the intact structures for WT/Delta RBDs and antibodies, missing residues  
40 in flexible loops were modeled using SWISS-MODEL. Delta RBD model was created  
41 by PyMOL2.5<sup>3</sup> to yield K417N and E484K on the basis of 7VVS.<sup>4</sup> The Delta model in  
42 our simulations have 4 mutations: K417N, L452R, T478K, and E484K.

43

### 44 **System preparation**

45 Protonation states were assessed using H++ 3.2<sup>5,6</sup> at pH 7.4. A cubic explicit water  
46 box described using the TIP3P model was used to solvated the complex system, which  
47 was extended by 10 Å from the solute. An atmosphere of 150 mM NaCl was also  
48 included in all simulations. The generated models were parametrized using amber  
49 ff14SB force fields<sup>7</sup> for protein. Subsequently, the parameter files created by tleap in  
50 Amber18<sup>8</sup> were converted to gromacs format. 5000 steps of minimization including  
51 2500 steps of steepest descent minimization and 2500 steps of conjugate gradient  
52 minimization were performed to remove bad contacts during the energy minimization  
53 phase. Equilibration in NPT ensemble was run at 1.0 bar and 300 K for 500 000 steps  
54 at 2 fs/step. Gromacs2020.2<sup>9,10</sup> software package was used to run the minimization,  
55 equilibration simulations with position constraints (1 kcal/mol/Å<sup>2</sup>) on protein.

56

### 57 **Molecular dynamics (MD) simulations**

58 Mdrun module in Gromacs2020.2 was used to perform 200ns MD production

59 simulations in triplicate at 300 K, 1 bar for all complexes. Temperature and pressure  
60 were controlled by Langevin thermostat<sup>11</sup> and a Nosé-Hoover Langevin barostat.<sup>12,13</sup>  
61 Bonds involving hydrogen atoms were fixed by the SHAKE algorithm.<sup>14</sup> The cutoff  
62 distance applied for van der Waals interactions is 10 Å. In order to deal with the  
63 coordination effects between zinc and adjacent nitrogen atom of HIS or oxygen atom  
64 of GLU in the RBD-ACE2 systems, simple distance restraint method was used. The  
65 force constant for distance restraints and time constant for distance restraints running  
66 average were set to 1.0 kJ/mol/nm<sup>2</sup> and 0.0 picosecond, respectively. All simulations  
67 were performed using particle-mesh Ewald (PME) for long-range electrostatic  
68 interactions.<sup>15</sup> Mdconvert<sup>16</sup> was used to convert the trajectories to amber format.  
69 Cpptraj module in Amber18 was used for trajectory processing and analysis.

70

### 71 **Binding free energy calculation**

72 Binding free energy ( $\Delta G$ ) of RBD-antibody or ACE2-RBD complexes was  
73 calculated by MM/GBSA<sup>17</sup> method using GB OBC model (igb = 5) with a salt  
74 concentration of 150 mM. 750 snapshots evenly extracted from 50-200ns trajectories  
75 were used for binding free energy calculation. In this study, the internal and external  
76 dielectric constants were set to be 1.0 and 78.5 separately. The free energy  
77 decomposition analysis was carried out using an internal program with idecomp = 1.

78

### 79 **Binding ELISA**

80 To measure the affinity constant of SARS-CoV-2 Spike protein RBD<sub>WT</sub> (His Tag)  
81 (GenScript), SARS-CoV-2 Spike RBD<sub>Delta</sub> (K417N, L452R, T478K) protein (His Tag)  
82 (Sino Biological), and SARS-CoV-2 B.1.1.529 (Omicron) Spike RBD protein (His Tag)  
83 (Sino Biological) against the ACE2-Fc protein (GenScript), a non-competitive ELISA  
84 was performed.<sup>18</sup> After being coated with 1, 2, and 4 µg/mL ACE2-Fc Tag protein  
85 overnight at 4 °C, the 96-well plates were washed with 0.1% PBST, blocked with 3%  
86 BSA in PBS (Thermo Fisher Scientific, Waltham, MA, USA), and then incubated with  
87 4- fold serial dilutions of RBDs at 37 °C for 1 h. The tested concentrations were between

88 10 µg/mL and 38 pg/mL. Thereafter, His tag antibody (HRP) (Sino Biological) was  
89 added at 1:10000 dilution, and the plate was incubated at 37 °C for 1 h. After washing  
90 the plate thrice with 0.1% PBST, TMB substrate (SeraCare, Milford, MA, USA) was  
91 added and the reaction was stopped with 2 M H<sub>2</sub>SO<sub>4</sub>, and the absorbance was read at  
92 450 nm with Infinite F50 microplate reader (Tecan Trading AG, Zürich, Switzerland).

93 The following formula for calculation of affinity constant ( $K_{aff}$ ) in 1/mol (M<sup>-1</sup>) was used:

$$94 \quad K_{aff} = \frac{(n - 1)}{2(n[Ab]1 - [Ab]2)}$$

95 where n represents the ratio between the highest and the lowest ACE2 concentration for  
96 the three possible comparisons. In a comparison between two ACE2 concentrations,  
97 [Ab]1 represents the molar RBD concentration calculated for OD-50 (half of maximum  
98 OD450 nm), corresponding to the lower ACE2 concentration. [Ab]2 represents the  
99 molar RBD concentration calculated for OD-50 measured at 450 nm, corresponding to  
100 the higher ACE2 concentration. The calculation of [Ab]1 and [Ab]2 was carried out by  
101 interpolating the value of OD-50 in the curve of OD450 nm vs. RBD concentration,  
102 fitting the curve to a four-parameters logistic regression by GraphPad Prism version  
103 9.1.1 (GraphPad Software, San Diego, California, USA). The  $K_{aff}$  value for each RBD  
104 represents the mean ± the standard deviation (SD) of the three calculated  $K_{aff}$  values.

105 The ACE2 binding affinities of different RBDs by the ELISA method in this letter  
106 ( $K_{aff}$ =6.01 ±3.02×10<sup>7</sup> L/mol for RBD<sub>WT</sub>, 26.91 ±0.46×10<sup>7</sup> L/mol for RBD<sub>Delta</sub>) show the  
107 same decrease tendency to those determined by either SPR method with Biacore 3000  
108 ( $K_D$  of RBD<sub>WT</sub> = 8.3 nM,  $K_D$  of RBD<sub>Delta</sub> = 4.0 nM)<sup>19</sup> (RBD<sub>Delta</sub> is stronger than RBD<sub>WT</sub>)  
109 or a BLI based method with Octet RED96E (Sartorius) ( $K_D$  of RBD<sub>WT</sub> = 21.3 nM).<sup>20</sup> In  
110 addition, the ELISA assay in this study is performed in same plate under the same assay  
111 condition, leading to lower variations and also high throughput capability. Furthermore,  
112 in comparison with other methods, such as SPR and BLI based methods, the ELISA  
113 method does not need to further derivatize the RBD molecules to be analyzed, which  
114 avoids the potential effect of derivatization on the affinity measurement of the  
115 molecules. Therefore, ELISA is employed for this study.

116

## 117 **Statistics analysis**

118 Homogeneity of variance was tested by F test. Subsequently, in order to analyze

119 whether there is significant difference between the binding affinities for either wild type,  
120 Delta or Omicron RBD to ACE2 or mAbs, the two-tailed unpaired Student's t-test with  
121 equal or unequal variance was used for every two groups. *P* values of less than 0.05  
122 were considered to be significant.

123

## 124 **Supplementary Text**

### 125 **Effects of Omicron variant on the binding affinities to three marketed mAbs**

126 We performed a comprehensive literature survey and found that the  
127 experimentally determined binding affinity of all the 3 marketed mAbs (Etesevimab,  
128 Bamlanivimab and Regdanvimab) calculated in this letter to the Omicron RBD were  
129 reported in the literature reported on 14-12-2021,<sup>21</sup> which indicate that all the binding  
130 affinities of the 3 mAbs to RBD<sub>Omicron</sub> decrease by 3 orders of magnitude in comparison  
131 with that of RBD<sub>WT</sub>. Our calculations show that RBD<sub>Omicron</sub> has much weaker binding  
132 affinities to the 2 marketed mAbs (Etesevimab and Bamlanivimab,  $\Delta G = -37.95$  and -  
133 22.42 kcal/mol) in comparison with the RBD<sub>WT</sub> (-67.78 and -52.90 kcal/mol),  
134 demonstrating a good agreement with the experimental results of high immune evasion  
135 risk. The calculated binding affinity of RBD<sub>Omicron</sub> to Regdanvimab (-44.58 kcal/mol)  
136 also shows a decrease trend of binding affinity compared to RBD<sub>WT</sub> (-48.86 kcal/mol)  
137 but without significance.

138 In addition, Xie and Ho reported their bioassay results of the binding affinity of  
139 RBD<sub>Omicron</sub> to the 2 marketed mAbs (Etesevimab and Bamlanivimab),<sup>22,23</sup> also shows a  
140 good agreement with our prediction. In overall, the prediction in this letter is in  
141 agreement with conclusion from bioassay.

142

### 143 **Interaction between the RBDs and the ACE2 at molecular and atomic level**

144 The binding free energy decomposition of residues (Fig. 1e) shows that energy  
145 contribution of N501 in RBD<sub>WT</sub> is  $-2.12 \pm 1.13$  kcal/mol, while the energy contribution  
146 of Y501 in RBD<sub>Omicron</sub> is  $-6.97 \pm 0.30$  kcal/mol (a stronger attraction). By analyzing  
147 molecular dynamic trajectories, we found that Y501<sub>RBD</sub> and Y41<sub>ACE2</sub> could form a

148 strong  $\pi$ - $\pi$  stacking interaction (Figure S5a). The center of mass distance between  
149 Y501<sub>RBD</sub> and Y41<sub>ACE2</sub> is around 5.5 Å throughout the 200ns trajectory (Figure S5b).

150 The common feature of Q493K and Q498R mutation is that both of them mutates  
151 from electrically neutral Q to positively charged amino acids (K and R). By binding  
152 free energy decomposition, the energy contributions of both K493 and R498 are  
153 decreased. Specifically, the energy contribution of K493 in RBD<sub>Omicron</sub> decreased about  
154 1.90 kcal/mol to Q493 in RBD<sub>WT</sub>, and the energy contribution of R498 in RBD<sub>Omicron</sub>  
155 decreased about 4.15 kcal/mol to Q498 in RBD<sub>WT</sub>. Q493 in RBD<sub>WT</sub> could form tight  
156 interactions with K31 and E35 in ACE2 (Figure S6). By calculating distances of  
157 K31<sub>ACE2</sub>-Q493<sub>RBD</sub> and K31<sub>ACE2</sub>-K493<sub>RBD</sub> (Figure S6a), we found that K31<sub>ACE2</sub> moves  
158 away from K493<sub>RBD</sub>, which may be due to the repulsion of lysine with the same  
159 electrical properties. K353<sub>ACE2</sub> also moves away from R498<sub>RBD</sub> (Figure S7c). Hence,  
160 we speculate that the repulsion between positively charged residues is the main cause  
161 of the decreased binding free energy in ACE2-RBD<sub>Omicron</sub>. K493<sub>RBD</sub> forms a tighter  
162 interaction with E35<sub>ACE2</sub> (Figure S6b), which partly compensates for the effect of  
163 positively charge repulsion. While the lack of compensation effect in R498<sub>RBD</sub> (Figure  
164 S7a & S7b) leads to its severe decreased interactions with ACE2.

165 We also performed the binding free energy decomposition for all the residues on  
166 different RBMs to human ACE2, which is depicted in Figure S8.

167

168

169

170

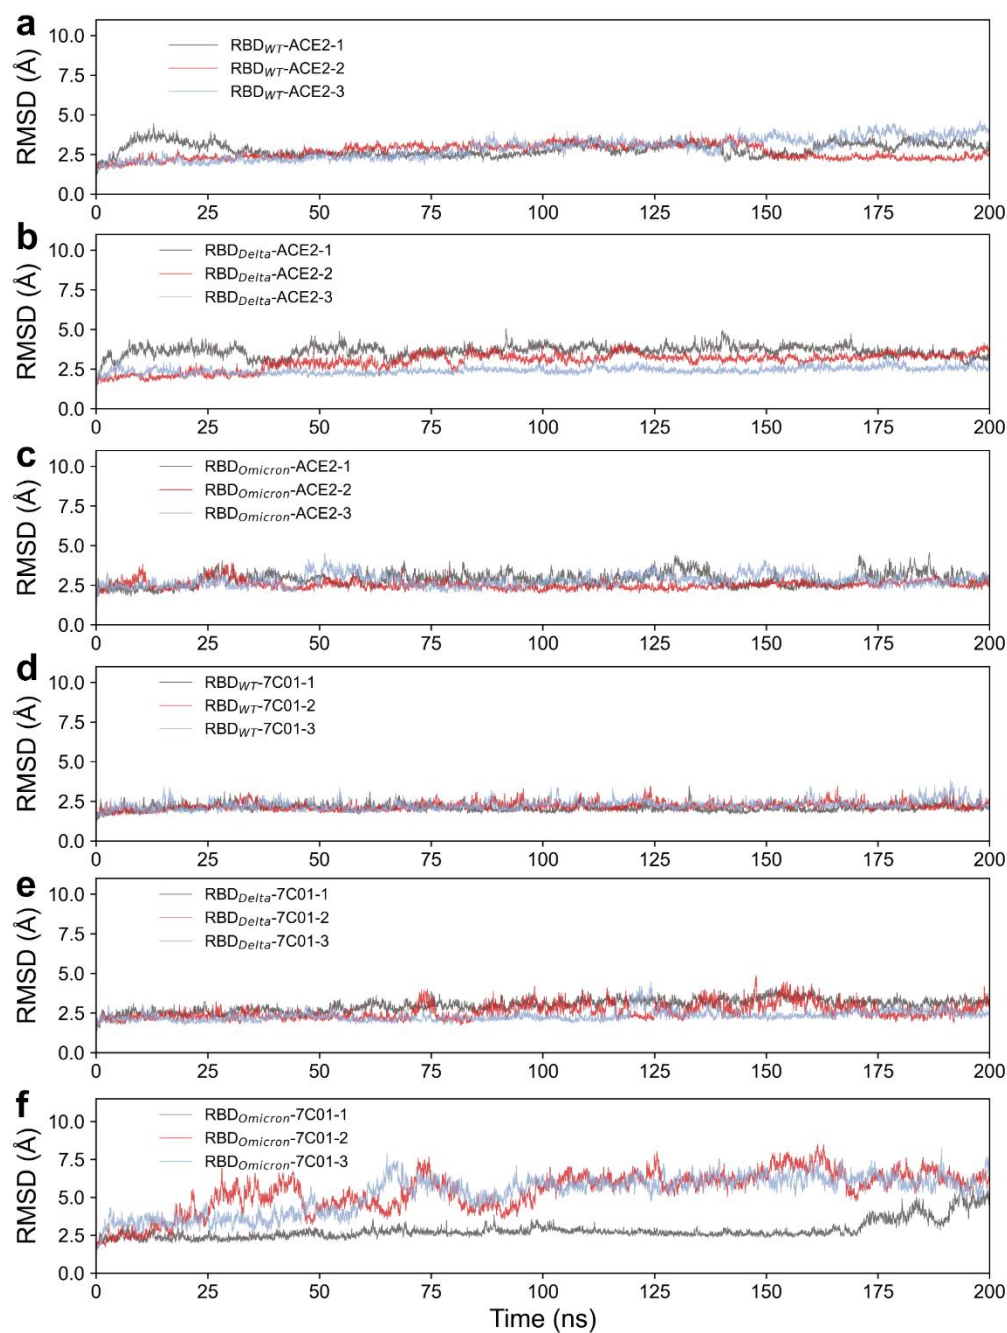

172

173 **Figure S1. Time dependence of the heavy atom RMSD during 200 ns MD**  
174 **simulation. a, b and c for the systems formed by the different RBDs and ACE2. d, e**  
175 **and f for the systems formed by the different RBDs and Etesevimab (PDB ID: 7C01).**

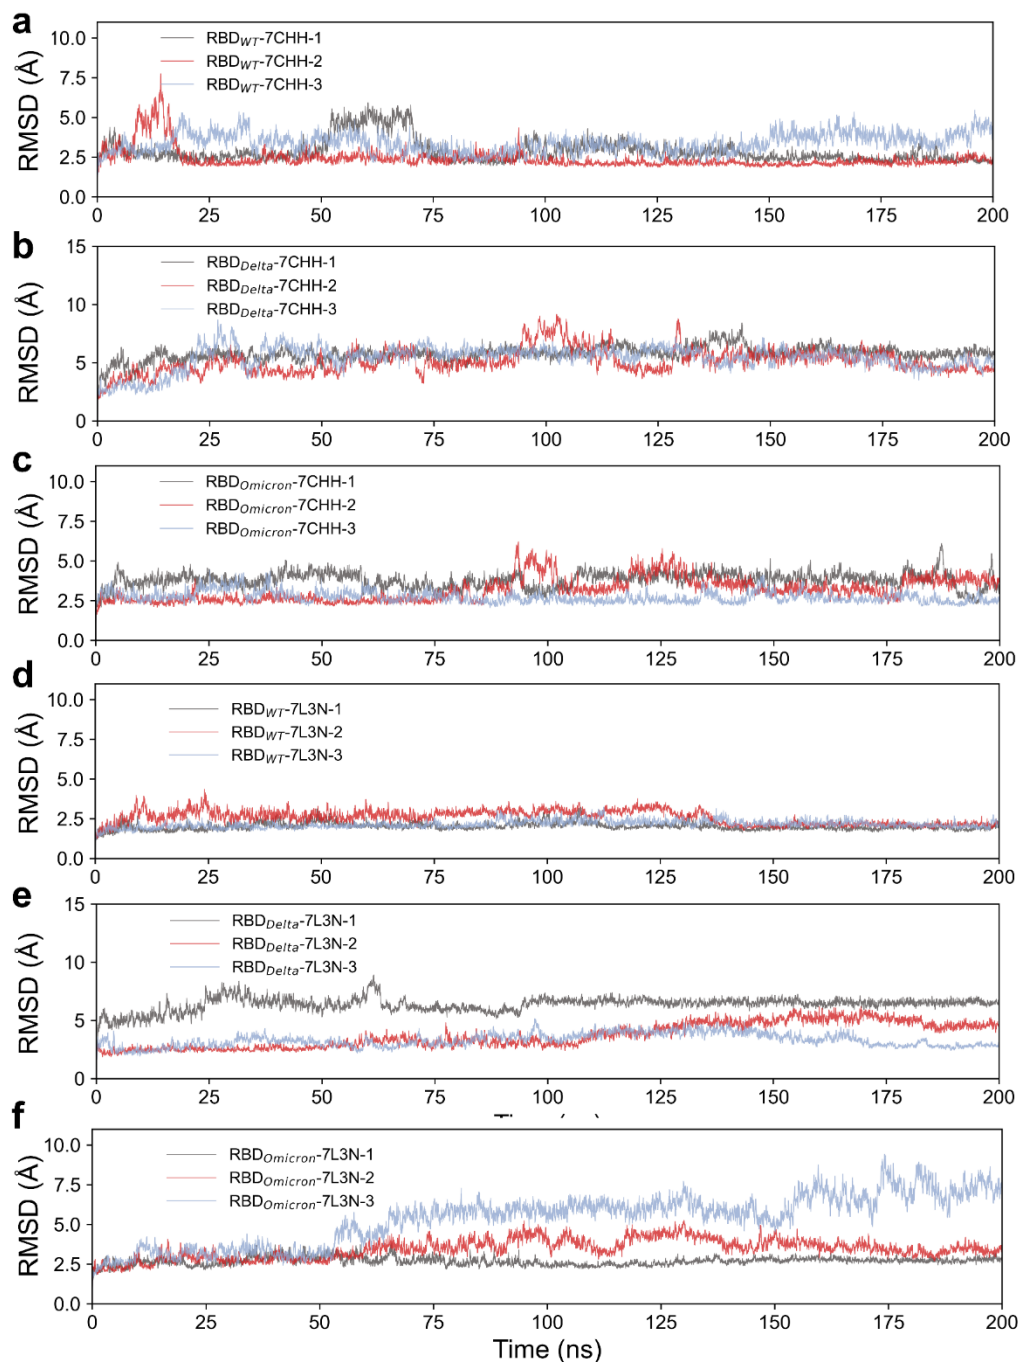

177

178 **Figure S2. Time dependence of the heavy atom RMSD during 200 ns MD**  
179 **simulation. a, b and c** for the systems formed by the different RBDs and BD-368-2  
180 (PDB ID: 7CHH). **d, e and f** for the systems formed by the different RBDs and  
181 Bamlanivimab (PDB ID: 7L3N).

182



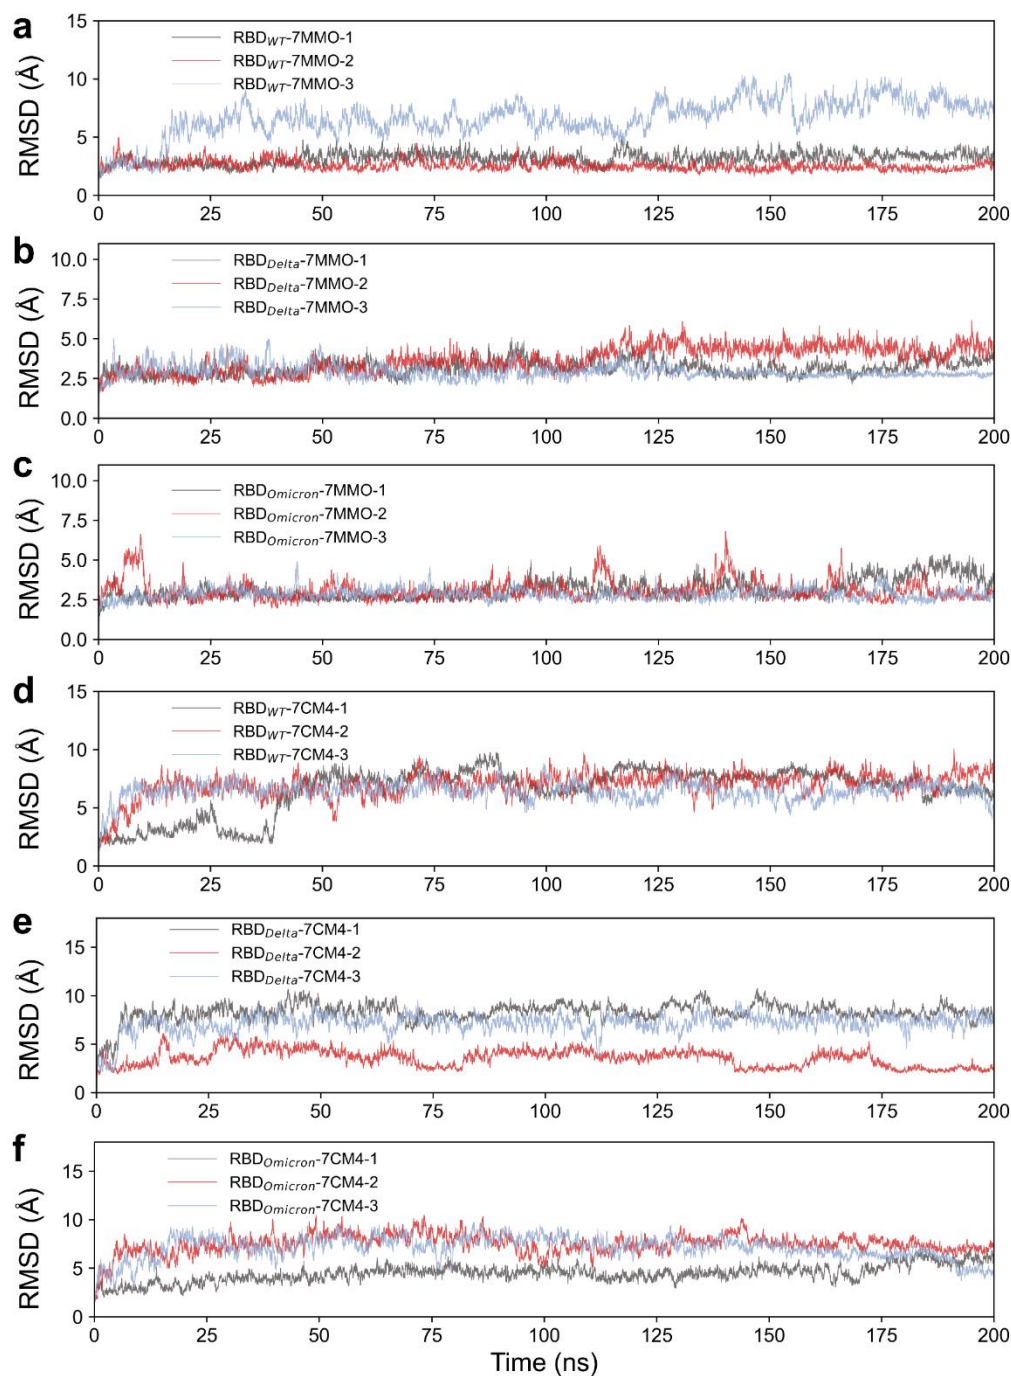

184

185 **Figure S3. Time dependence of the heavy atom RMSD during 200 ns MD**  
186 **simulation. a, b and c** for the systems formed by the different RBDs and Bebtelovimab  
187 (PDB ID: 7MMO). **d, e and f** for the systems formed by the different RBDs and  
188 Regdanvimab (PDB ID: 7CM4).

189

190 **Figure S4**

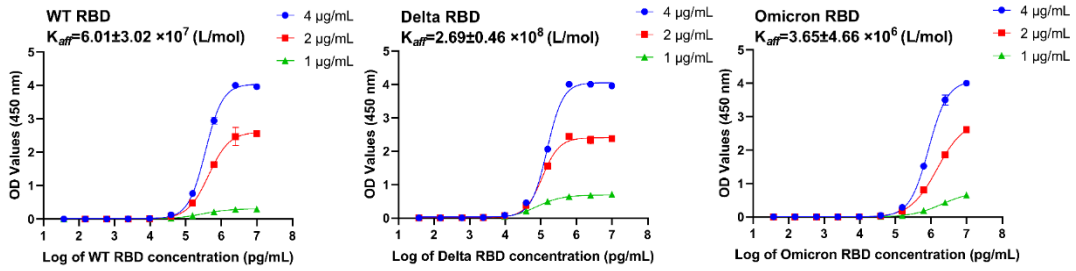

191

192 **Figure S4. Experimental ELISA curves for three RBDs at different ACE2 coating**

193 **concentrations.** The calculated wild type RBD concentrations (ng/mL) at OD-50 were:

194 351.0 (4 µg/mL), 411.0 (2 µg/mL), and 287.0 (1 µg/mL), Delta RBD concentrations

195 (ng/mL) at OD-50 were: 145.7 (4 µg/mL), 106.9 (2 µg/mL), and 77.4 (1 µg/mL), and

196 Omicron RBD concentrations (ng/mL) at OD-50 were: 831.7 (4 µg/mL), 1246.2 (2

197 µg/mL), and 10146.6 (1 µg/mL).

198

199 **Figure S5**

200

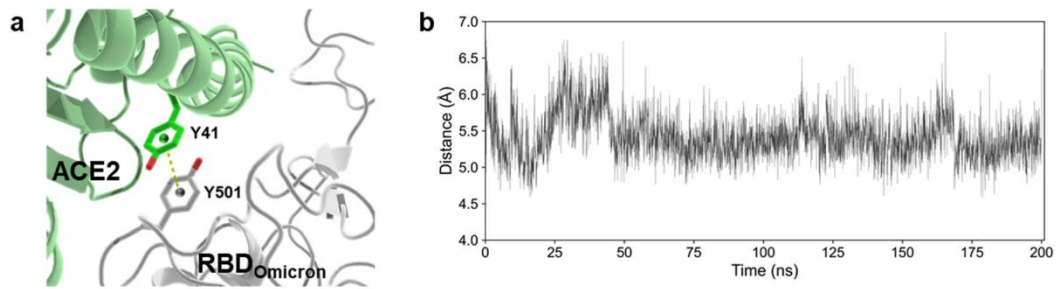

201

202 **Figure S5. The interaction between Y501<sub>RBD</sub> and Y41<sub>ACE2</sub>.** (a) Diagram of Y501<sub>RBD</sub>-

203 Y41<sub>ACE2</sub>  $\pi$ - $\pi$  stacking interaction. (b) The distance between the center of mass of

204 Y501<sub>RBD</sub> and Y41<sub>ACE2</sub>.

205

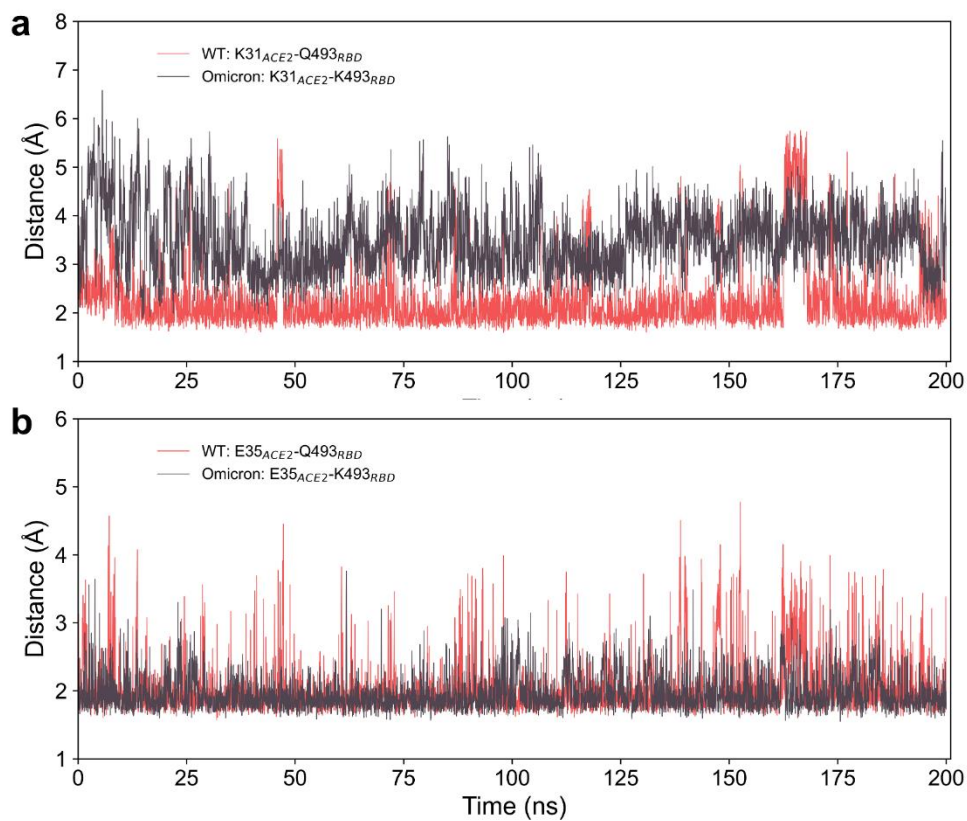

207

208 **Figure S6. The dependence of minimum distance during 200 ns MD simulation. (a)**

209 Minimum distance between K31<sub>ACE2</sub> and Q/K493<sub>RBD</sub>. **(b)** Minimum distance between

210 E35<sub>ACE2</sub> and Q/K493<sub>RBD</sub>.

211

212 **Figure S7**

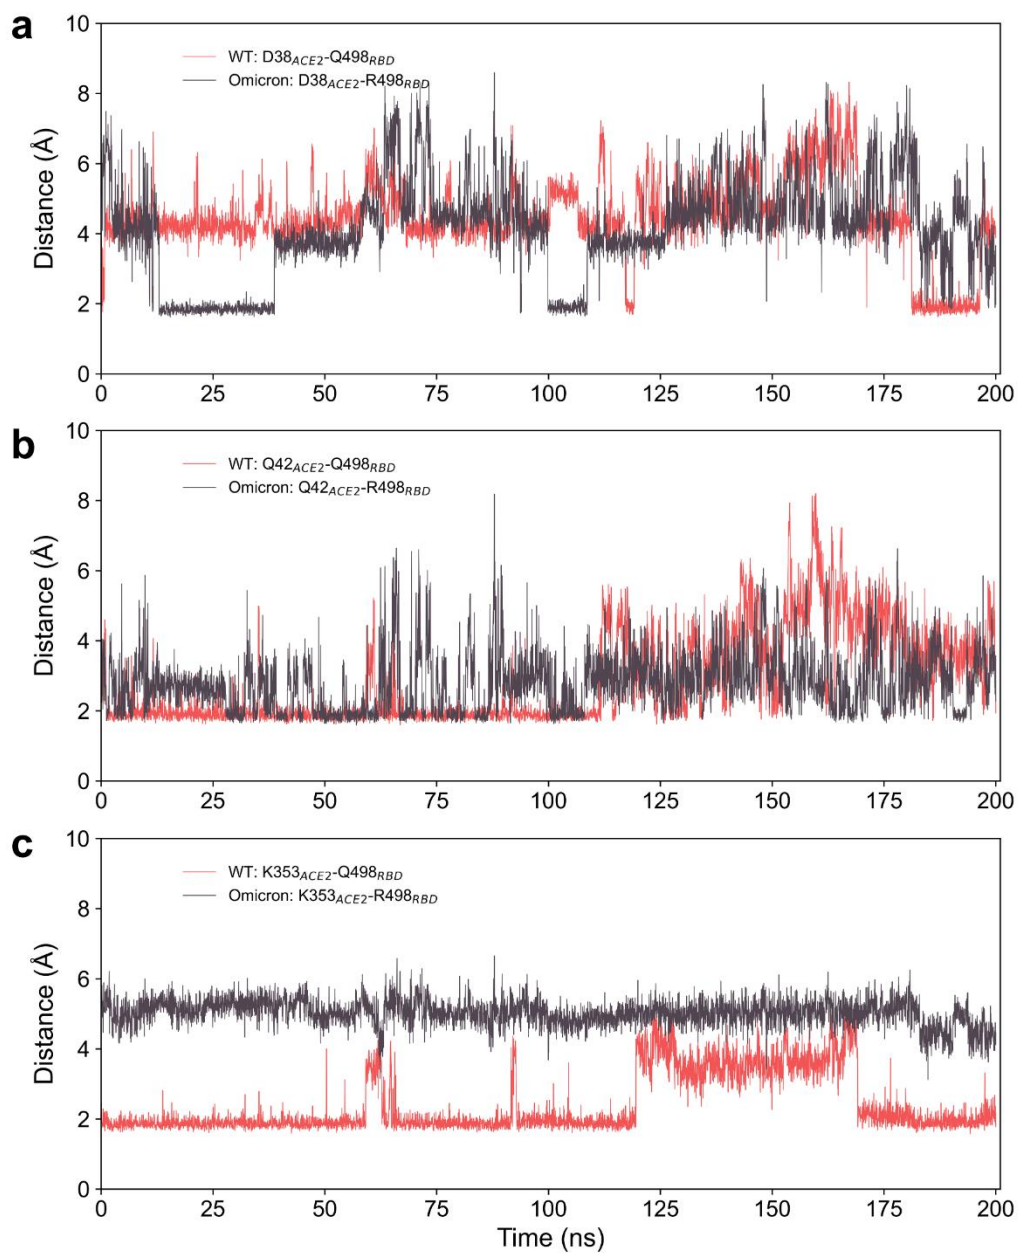

213

214 **Figure S7. The dependence of minimum distance during 200 ns MD simulation (a)**

215 Minimum distance between D38<sub>ACE2</sub> and Q/R498<sub>RBD</sub>. (b) Minimum distance between

216 Q42<sub>ACE2</sub> and Q/R498<sub>RBD</sub>. (c) Minimum distance between K353<sub>ACE2</sub> and Q/R498<sub>RBD</sub>.

217

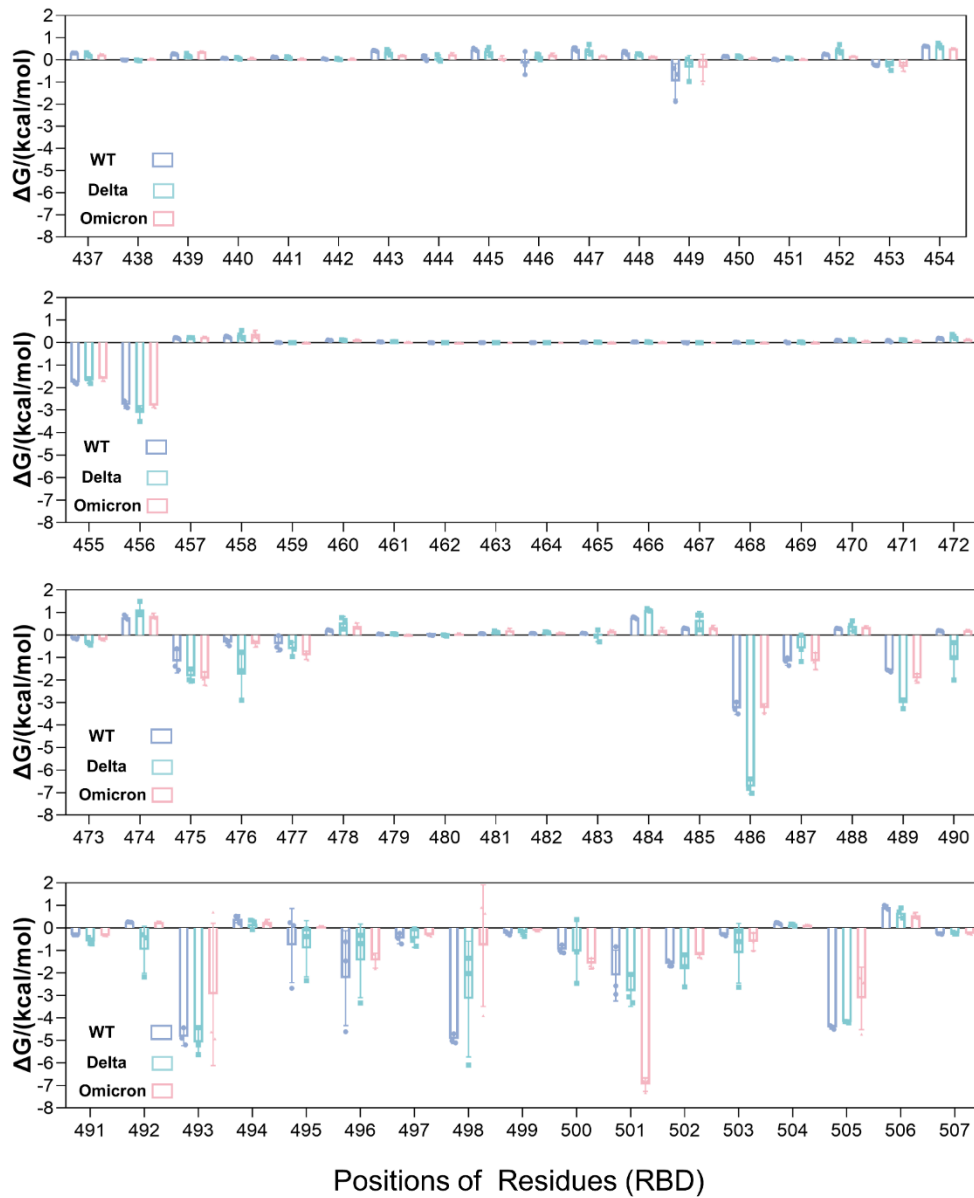

219

220 **Figure S8. The binding free energy decomposition of ACE2 to RBM residues (437-**

221 **507) in the different RBDs.**

222

223

224 **Table S1**

225 **Table S1. The initial pdb structures of the simulated systems.**

| Name (.pdb)      | System                               | Original PDB ID |
|------------------|--------------------------------------|-----------------|
| rbd_ace2_wt      | RBD <sub>WT</sub> -ACE2              | 6VW1            |
| rbd_ace2_delta   | RBD <sub>Delta</sub> -ACE2           | 7VVS, 6VW1      |
| rbd_ace2_omicron | RBD <sub>Omicron</sub> -ACE2         | 7N1X, 6VW1      |
| 7c01_wt          | RBD <sub>WT</sub> -Etesevimab        | 7C01            |
| 7c01_delta       | RBD <sub>Delta</sub> -Etesevimab     | 7C01            |
| 7c01_omicron     | RBD <sub>Omicron</sub> -Etesevimab   | 7C01            |
| 7mmo_wt          | RBD <sub>WT</sub> -Bebtelovimab      | 7MMO            |
| 7mmo_delta       | RBD <sub>Delta</sub> -Bebtelovimab   | 7MMO            |
| 7mmo_omicron     | RBD <sub>Omicron</sub> -Bebtelovimab | 7MMO            |
| 7cm4_wt          | RBD <sub>WT</sub> -Regdanvimab       | 7CM4            |
| 7cm4_delta       | RBD <sub>Delta</sub> -Regdanvimab    | 7CM4            |
| 7cm4_omicron     | RBD <sub>Omicron</sub> -Regdanvimab  | 7CM4            |
| 7chh_wt          | RBD <sub>WT</sub> -(BD-368-2)        | 7CHH            |
| 7chh_delta       | RBD <sub>Delta</sub> -(BD-368-2)     | 7CHH            |
| 7chh_omicron     | RBD <sub>Omicron</sub> -(BD-368-2)   | 7CHH            |
| 7l3n_wt          | RBD <sub>WT</sub> -Bamlanivimab      | 7L3N            |
| 7l3n_delta       | RBD <sub>Delta</sub> -Bamlanivimab   | 7L3N            |
| 7l3n_omicron     | RBD <sub>Omicron</sub> -Bamlanivimab | 7L3N            |

226

227 **Table S2**228 **Table S2. The parameter files in gromacs format of the simulated systems.**

| System                               | PATH                     | Original PDB ID | File type                                                      |
|--------------------------------------|--------------------------|-----------------|----------------------------------------------------------------|
| RBD <sub>WT</sub> -ACE2              | Data_S2\rbd_ace2\wt      | 6VW1            | Topology,<br>structure, index<br>files in<br>gromacs<br>format |
| RBD <sub>Delta</sub> -ACE2           | Data_S2\rbd_ace2\delta   | 7VVS, 6VW1      |                                                                |
| RBD <sub>Omicron</sub> -ACE2         | Data_S2\rbd_ace2\omicron | 7N1X, 6VW1      |                                                                |
| RBD <sub>WT</sub> -Etesevimab        | Data_S2\7c01\wt          | 7C01            |                                                                |
| RBD <sub>Delta</sub> -Etesevimab     | Data_S2\7c01\delta       | 7C01            |                                                                |
| RBD <sub>Omicron</sub> -Etesevimab   | Data_S2\7c01\omicron     | 7C01            |                                                                |
| RBD <sub>WT</sub> -Bebtelovimab      | Data_S2\7mmo\wt          | 7MMO            |                                                                |
| RBD <sub>Delta</sub> -Bebtelovimab   | Data_S2\7mmo\delta       | 7MMO            |                                                                |
| RBD <sub>Omicron</sub> -Bebtelovimab | Data_S2\7mmo\omicron     | 7MMO            |                                                                |
| RBD <sub>WT</sub> -Regdanvimab       | Data_S2\7cm4\wt          | 7CM4            |                                                                |
| RBD <sub>Delta</sub> -Regdanvimab    | Data_S2\7cm4\delta       | 7CM4            |                                                                |
| RBD <sub>Omicron</sub> -Regdanvimab  | Data_S2\7cm4\omicron     | 7CM4            |                                                                |
| RBD <sub>WT</sub> -(BD-368-2)        | Data_S2\7chh\wt          | 7CHH            |                                                                |
| RBD <sub>Delta</sub> -(BD-368-2)     | Data_S2\7chh\delta       | 7CHH            |                                                                |
| RBD <sub>Omicron</sub> -(BD-368-2)   | Data_S2\7chh\omicron     | 7CHH            |                                                                |
| RBD <sub>WT</sub> -Bamlanivimab      | Data_S2\7l3n\wt          | 7L3N            |                                                                |
| RBD <sub>Delta</sub> -Bamlanivimab   | Data_S2\7l3n\delta       | 7L3N            |                                                                |
| RBD <sub>Omicron</sub> -Bamlanivimab | Data_S2\7l3n\omicron     | 7L3N            |                                                                |

229

230



231

232 **Table S3**233 **Table S3. The predicted mAb-RBD binding free energy (kcal/mol) of WT, Delta**234 **and Omicron variants.**

| Antibody                                  | PDB ID             | System                 | Average        | 1             | 2             | 3             |
|-------------------------------------------|--------------------|------------------------|----------------|---------------|---------------|---------------|
| Etesevimab<br>CB-6<br>(Launched)          | 7C01 <sup>24</sup> | RBD <sub>WT</sub>      | -67.78 ± 2.12  | -65.33 ± 0.34 | -68.85 ± 0.33 | -69.15 ± 0.34 |
|                                           |                    | RBD <sub>Delta</sub>   | -42.34 ± 5.78  | -37.64 ± 0.29 | -40.6 ± 0.33  | -48.79 ± 0.34 |
|                                           |                    | RBD <sub>Omicron</sub> | -39.75 ± 1.63  | -36.28 ± 0.43 | -38.04 ± 0.45 | -39.54 ± 0.39 |
| Bebtelovimab<br>LY-CoV-1404<br>(Launched) | 7MMO <sup>25</sup> | RBD <sub>WT</sub>      | -58.77 ± 2.97  | -56.52 ± 0.32 | -57.66 ± 0.40 | -62.14 ± 0.58 |
|                                           |                    | RBD <sub>Delta</sub>   | -53.96 ± 2.27  | -51.49 ± 0.28 | -54.45 ± 0.26 | -55.95 ± 0.34 |
|                                           |                    | RBD <sub>Omicron</sub> | -59.09 ± 4.37  | -54.76 ± 0.34 | -59.02 ± 0.28 | -63.50 ± 0.35 |
| Regdanvimab<br>CT-P59<br>(Launched)       | 7CM4 <sup>26</sup> | RBD <sub>WT</sub>      | -48.86 ± 5.69  | -43.94 ± 0.32 | -47.55 ± 0.28 | -55.10 ± 0.27 |
|                                           |                    | RBD <sub>Delta</sub>   | -34.01 ± 10.39 | -22.06 ± 0.33 | -39.03 ± 0.33 | -40.94 ± 0.37 |
|                                           |                    | RBD <sub>Omicron</sub> | -44.58 ± 4.39  | -45.21 ± 0.53 | -39.91 ± 0.32 | -48.63 ± 0.34 |
| BD-368-2<br>(Clinical)                    | 7CHH <sup>27</sup> | RBD <sub>WT</sub>      | -28.30 ± 5.96  | -22.42 ± 0.32 | -28.14 ± 0.33 | -34.33 ± 0.26 |
|                                           |                    | RBD <sub>Delta</sub>   | -11.09 ± 5.86  | -7.08 ± 0.24  | -8.37 ± 0.26  | -17.82 ± 0.33 |
|                                           |                    | RBD <sub>Omicron</sub> | -13.31 ± 6.81  | -7.64 ± 0.21  | -11.42 ± 0.40 | -20.86 ± 0.29 |
| Bamlanivimab<br>LY-CoV-555<br>(Launched)  | 7L3N <sup>28</sup> | RBD <sub>WT</sub>      | -52.90 ± 0.29  | -52.69 ± 0.24 | -52.78 ± 0.25 | -53.23 ± 0.27 |
|                                           |                    | RBD <sub>Delta</sub>   | -21.84 ± 6.92  | -17.43 ± 0.20 | -18.28 ± 0.23 | -29.81 ± 0.33 |
|                                           |                    | RBD <sub>Omicron</sub> | -22.42 ± 1.61  | -20.78 ± 0.21 | -22.49 ± 0.38 | -23.99 ± 0.27 |

235

236

237 **Movie S1.**

238 **The interaction modes between ACE2 and 3 different RBDs.** The movie shows the  
239 molecular dynamics simulations of three RBDs (i.e. RBD in WT, Delta and Omicron)  
240 interacting with ACE2. For illustrative purposes, RBD is shown as blue cartoon, and  
241 ACE2 in transparent green cartoon. Mutations are labeled and shown as purple sticks  
242 on RBD<sub>Delta</sub> and yellow sticks on RBD<sub>Omicron</sub>. Only one 200ns MD trajectory was shown.

243

244

## 245 **References**

- 246 1 Waterhouse, A. *et al.* SWISS-MODEL: homology modelling of protein structures and  
247 complexes. *Nucleic Acids Res.* **46**, W296-W303 (2018).
- 248 2 Shang, J. *et al.* Structural basis of receptor recognition by SARS-CoV-2. *Nature.* **581**,  
249 221-224 (2020).
- 250 3 Schrödinger, L. *The PyMOL Molecular Graphics System, Version 2.5* (2021).
- 251 4 Yang, T. J., Yu, P.Y., Chang, Y.C., Hsu, S.T.D. Cryo-EM structure of SARS-CoV-2 S-  
252 Delta variant (B.1.617.2), one RBD-up conformation 5. DOI: 10.2210/pdb7V7S/pdb  
253 (2021).
- 254 5 H++, <http://biophysics.cs.vt.edu/H++>, (accessed 1 December, 2021)..
- 255 6 Anandakrishnan, R., Aguilar, B. & Onufriev, A. V. H++ 3.0: automating pK prediction  
256 and the preparation of biomolecular structures for atomistic molecular modeling and  
257 simulations. *Nucleic Acids Res.* **40**, W537-541 (2012).
- 258 7 Duan, Y. *et al.* A point-charge force field for molecular mechanics simulations of  
259 proteins based on condensed-phase quantum mechanical calculations. *J. Comput.*  
260 *Chem.* **24**, 1999-2012 (2003).
- 261 8 Case D.A. *et al.* AMBER 2018, University of California, San Francisco (2018).
- 262 9 Abraham, M. J. *et al.* GROMACS: High performance molecular simulations through  
263 multi-level parallelism from laptops to supercomputers. *SoftwareX* **1-2**, 19-25 (2015).
- 264 10 Lindahl, A., Hess & van der Spoel. GROMACS 2020.2 Manual (2020.2). Zenodo.,  
265 <https://doi.org/10.5281/zenodo.3773799> (accessed 1 December, 2021).
- 266 11 Ermak, D. L. & McCammon, J. A. Brownian dynamics with hydrodynamic interactions.  
267 *The Journal of Chemical Physics* **69**, 1352-1360 (1978).
- 268 12 Feller, S. E., Zhang, Y., Pastor, R. W. & Brooks, B. R. Constant pressure molecular  
269 dynamics simulation: The Langevin piston method. *The Journal of Chemical Physics*  
270 **103**, 4613-4621 (1995).
- 271 13 Martyna, G. J., Tobias, D. J. & Klein, M. L. Constant pressure molecular dynamics  
272 algorithms. *The Journal of Chemical Physics* **101**, 4177-4189 (1994).
- 273 14 Ryckaert, J.-P., Ciccotti, G. & Berendsen, H. J. C. Numerical integration of the

- 274 cartesian equations of motion of a system with constraints: molecular dynamics of n-  
275 alkanes. *Journal of Computational Physics* **23**, 327-341 (1977).
- 276 15 Essmann, U. *et al.* A smooth particle mesh Ewald method. *The Journal of Chemical*  
277 *Physics* **103**, 8577-8593 (1995).
- 278 16 McGibbon, R. T. *et al.* MDTraj: A Modern Open Library for the Analysis of Molecular  
279 Dynamics Trajectories. *Biophys J* **109**, 1528-1532 (2015).
- 280 17 Kollman, P. A. *et al.* Calculating structures and free energies of complex molecules:  
281 combining molecular mechanics and continuum models. *Acc. Chem. Res.* **33**, 889-897  
282 (2000).
- 283 18 Beatty, J. D., Beatty, B. G. & Vlahos, W. G. Measurement of monoclonal antibody  
284 affinity by non-competitive enzyme immunoassay. *J. Immunol. Methods* **100**, 173-179  
285 (1987).
- 286 19 Liu, H. *et al.* The Lambda variant of SARS-CoV-2 has a better chance than the Delta  
287 variant to escape vaccines. Preprint at  
288 <https://www.biorxiv.org/content/10.1101/2021.08.25.457692v1> (2021).
- 289 20 Augusto, G. *et al.* In vitro data suggest that Indian delta variant B.1.617 of SARS-CoV-  
290 2 escapes neutralization by both receptor affinity and immune evasion. *Allergy*,  
291 <https://doi.org/10.1111/all.15065> (2021).
- 292 21 Cameroni, E. *et al.* Broadly neutralizing antibodies overcome SARS-CoV-2 Omicron  
293 antigenic shift. Preprint at  
294 <https://www.biorxiv.org/content/10.1101/2021.12.12.472269v1> (2021).
- 295 22 Cao, Y. *et al.* B.1.1.529 escapes the majority of SARS-CoV-2 neutralizing antibodies  
296 of diverse epitopes. Preprint at  
297 <https://www.biorxiv.org/content/10.1101/2021.12.07.470392v1> (2021).
- 298 23 Liu, L. *et al.* Striking Antibody Evasion Manifested by the Omicron Variant of SARS-  
299 CoV-2. Preprint at <https://www.biorxiv.org/content/10.1101/2021.12.14.472719v1>  
300 (2021).
- 301 24 Shi, R. *et al.* A human neutralizing antibody targets the receptor-binding site of SARS-  
302 CoV-2. *Nature*. **584**, 120-124 (2020).
- 303 25 Westendorf, K. *et al.* LY-CoV1404 potently neutralizes SARS-CoV-2 variants. Preprint

304 at <https://www.biorxiv.org/content/10.1101/2021.04.30.442182v4> (2021).

305 26 Kim, C. *et al.* A therapeutic neutralizing antibody targeting receptor binding domain of  
306 SARS-CoV-2 spike protein. *Nat. Commun.* **12**, 288 (2021).

307 27 Du, S. *et al.* Structurally Resolved SARS-CoV-2 Antibody Shows High Efficacy in  
308 Severely Infected Hamsters and Provides a Potent Cocktail Pairing Strategy. *Cell.* **183**,  
309 1013-1023.e1013 (2020).

310 28 Jones, B. E. *et al.* LY-CoV555, a rapidly isolated potent neutralizing antibody, provides  
311 protection in a non-human primate model of SARS-CoV-2 infection. Preprint at  
312 <https://www.biorxiv.org/content/10.1101/2020.09.30.318972v3> (2020).

313

314
